# Supplementary material for: Low LINC00599 expression is a poor prognostic factor in glioma
Source: PubMed Central journal article supplement (PMC6443953; doi:10.1042/bsr20190232), 2019-04-02
Supplement: bsr20190232_Supp1.pdf [file bsr20190232_Supp1.pdf]

Cell migration assay

SW1783

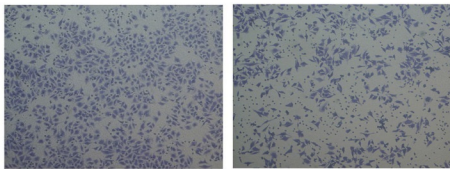

pcDNA-NC

pcDNA-LINC00599

U251

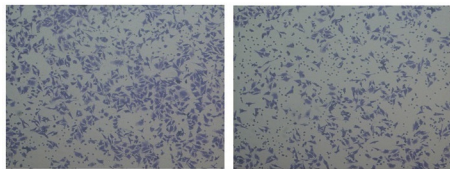

pcDNA-NC

pcDNA-LINC00599

Cell invasion assay

SW1783

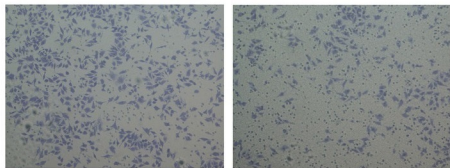

pcDNA-NC

pcDNA-LINC00599

U251

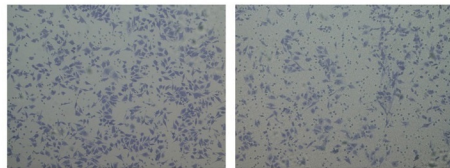

pcDNA-NC

pcDNA-LINC00599

>ENST00000517675.1 LINC00599 cdna:lincRNA

AATGGGGCTGGCTGAGCACCGTGGGTCGGCGAGGGCCCGCAAGGAAGGAGCGACCGACC  
GAGCCAGGCGCCCTCCGCAGACCTCCGCGCAGCGCCGCGGGCGGAGGGGAGGGGTCTG  
GAGCTCCCTCCGGCTGCCTGTCCCACCGGAGCCCGTGGGGTGGGGAGGTGTGCAGCCT  
GTGACAGACAGGGGCTTAGAGATGCAAACAGACTCAGGGAGAGAAACAGAAGCTGATTCT  
GTGACAGAAGCAGATCTGTGCAGCACAGATGCGGTGTGCGTGGGGAGGGGGTCGCCTGGG  
AGCGCATTGCGGAGTGCCTGTGTGTGCAGATTTTTCTCTGGGCTCAGGACTCATTGTATG  
TGGGTCAACACCTTCCTCCGTGACTGTGTTTTTGTCTGAGCTGAGTTTTTTGGTTTGCC  
CTTAAAAAATAATAATTTGGCATCCAGAGACTGGCAGACTGCCTCAGGGCCTGGACTGC  
GGATATATTGTGTTCTGCTTGTAGGTTTGGGGAGGAGGGCAGGCGGTAGGAAGGGAGAGGG  
GGAGCTGTTTGTACACTTTGCTGTAGAGCTGAGAGCACCTGACAAGCTTAAGGAAGTCG  
TTGGGCTATGTGGACAAGAAGGAGCCAGCTCCCAGCGGGTTCACAAGCTCTATCGGAGTT  
GAAAGCGTGGTCATGGCTCTAAGGAGCACCTCACGCCCTCCCTGTAGCTGTTATTGCAGT  
TTCAGGCAGAGATCCAGGAGCTGCAGAGGAAGGGAGAGGCACAATAACCTACATGGACCC  
AAGGGAGACATGTGTTCCCTTTAAAAATGTGAACAGAAGGAAAAACAGAATGTGTGCAACT  
GGGGGTCTGAGGAAAGACTGTTTTGAAAGAGGCTGTGAGGAAATGAAAGGGTTAAGCTT  
TTCATCCTGAAGAACCTGCTTCCCAAATCAGGCCCTCCTCCCATCACTAGACCCTGAGCA  
GCAGCTGGTCTAGAGACCCCCCTCGTACTGCGCTGCCACAGTCTCATCCCATTCCAGC  
TCTGTATTAACCACCAAGCTGCAGCGGATGGGGCAAGACCTAAGCTCATTAAATTTCCAGG  
TGAGGAAAATGGAGGAGGGGAGGTCCCTGCAGTAGAGGGAGGAGCAGAGAAAAGGAGGCC  
AAGAGCTGGATCCTTCTGCCAGGAAGCTGCTGCATCCCTTCCCCGAGCATGGCAGAG  
GCCTGGCTTTGCAAGGCCAAGGCCATAAGGGATGCTTAGGAGATTAATTTGATTCTCTGAC  
ACAATAATCAAGCCCTAAGAGTCTCCACTGAAGCTTACTGAGGACTTCTTTCCTCTCCAA  
AGCCTCAGTCTAGCCTGCTAAATAAATAGTATTAGTATTCAGTGATGCCTTGATCAGGGCCCCT  
CCCCGGCCTCAGTTTCCCCAAATATTTATTAAGTACCTACTGTGTGCAATCCTTGTGTAA  
TTATTAACCTCTTAGGCTCTTCATTTGCCCTCCTAAAGCAGTGTTAGAGTCAGGCAGAGG  
TTAAGTGTGTTGCACCTCACCTAGATACTTCCAGAACCTTCTCTGGGTCTGCAGAATGTG  
GCACAACCTGCTTGCCCCGAGAGAGAAAGCTGCAGTGCACATCCTGCAGACTGCAGGT  
GCTGGGCTGCCTCTGGAGTCCCAGAAGGCAAGCTTGCTGCAGGACAGAAAGGAGAACA  
GCTTCTCTACCCCTGAGCCTTACAAGCCCTTGTCTATTTGCCGTTGCCTTCAAAATAT  
ACCTCCCCGAAAACAGTAGCTTTCTGAGTCTGGTGTCCCTCCGCCCTTTCTGGACAG  
GTTTGGGAAGAAGAAAGCAGTCAGTGTGGGCCTTATTGGGGTGTGAAGCGCCTTGCTCT  
GCCCTTCTGCTCACTGTGAAGGCCGCTGGATGCTTCTCTTAGGCATGGTTTAAGCCTCC  
GATTACTAAACCCCTTGCCCCACAAACGTCCACATTGACGAGCCTCTTTTTAGTAACTGC  
TTCCCCGTAATTCCTTACAGAGTTGCTGTACCCTTCGCTGATGTGCTGCCCTCCTGTAAA  
ACCTCCAGATGCCTTCCCACGTAATGCCCTTTCAGATGCTTTAAGCTGAGAGCTTAAAC  
CACAGGTACCATGGCTGACGCCCTGCCAGGTTTCTGCTGCAGATAATCTATGATGGGAGGG  
GCATATTTTTTACTTCATTACTTATGTAAACTCTTGTTCAGAAAAGCTTTAATGTGTGTG  
GGAGTGTCTGGGTCTATTAGGTCTGTGCGCATGGGTGTGGGCATTTGCCTGTGTCCACC  
GGGTGGGTCTCATTATGAAATGTATGTTTATGTAGGGCTTTAATGGCTGAAAATGGCAAA  
GAGATGAATAGACCACTTGCCCCATGTGTAATTGCCAGGCCCTTCTGTGCTCAAATGA  
GGTGTCCGAGTGAAGTCAAGCCCTCCCTTCTGTATTTGGGGCCTATTTATGCCACCAGT  
AATTTTATAAGAAATCTGAATAGTTCTCCCTTTGAGTGCATTTAACTCTTTAGTATCTT  
CTCTCTTACCTATTTGAGCCCTCTAGCTACAGTCTGGCTTAAATGAAAGGGGAATTATA

TGCTTAAGAAAAAGTAGGACACGGTTGAGGCAGTTTGCTGACTGAATACGCGAAGAAGGA  
CCTGATGGGCTCATATGCACCACTGCCATCACAGTCCCATCGTGATGCAAGCTTATATG  
ATTCTTGAGGTAACCTACCAGATACTTCCAGATTTAGAAATGTGTCAAAGGAAAAATTG  
GTGATACTCTTCTTTCCCCTGCCAGAAACAGCCCAGATCTCCTCTTAAGCGGAAAAGAGA  
TTGACCTTCTAGCAGAGGCAAAGGTAAACTCCTGTAAGTTACTTCTGTTACCAAAGGGAG  
GGGGCGGCTTTTGTGAATGTATGAGGAGCTTTTGCCAGAGAGATATTCGGAGGAGGGGT  
GTGCCATATGCACACATATATTTTCCCGCATAACCGTATCCAATGCTAGCATTAGAGG  
AAGGCATTTAGCCACCAAAAAGTCCATCCATCTATGCTGCTTCCACAGAGAAAACATTTTC  
TCTTCTCCTCTTGAACCTACATAATATCCTCCTCCCATTCCAACCTTAGAATGGAGTC  
TTCTGGGGCAGCTGCAAAGCGTTCTCCCTAGGACAGATGGAGCCTCCCTTTCCTCATCT  
ACTCTGTGGGTGGTTTCAGGGCCACGAGTCAACATGAGGAGTTGTGCTGGTGGTATGTG  
TGTGGAGGCTGGCTGGCTGATTCACAGTGACGAGGATGTCAATAATAACAAGAATGAG  
AATGATGGTACCTAATAAAGACTTTTTTTCCCAA

>LINC00599 cds:linRNA
